# Supplementary material for: Impact of admission serum potassium on mortality in patients with chronic kidney disease and cardiovascular disease
Source: Oxford University Press journal article supplement (doi:10.1093/qjmed/hcx118), 2017-06-10

**Supplemental table 1: ICD-9 for end-stage renal disease**

| ICD-9 | Condition |
| --- | --- |
| 585.5 | Chronic Kidney Disease, stage V |
| 585.6 | End Stage Renal Disease |
| 996.73 | Other complications due to renal dialysis device implant and graft |
| 996.68 | Infection and inflammatory reaction due to peritoneal dialysis catheter |
| 996.56 | Mechanical complication due to peritoneal dialysis catheter |
| 792.5 | Cloudy (hemodialysis or peritoneal dialysis) effluent |
| 458.21 | Hypotension of dialysis |

**Supplemental table 2: ICD-9 for principal diagnosis**

| Principal diagnosis group | ICD – 9 code |
| --- | --- |
| Cardiovascular disease | 390-459 |
| Hematology/oncology | 280-289, 140-239 |
| Infectious disease | 001-139 |
| Endocrine and metabolic disease | 240-279 |
| Respiratory disease | 460-519 |
| Gastrointestinal disease | 520-579 |
| Injury and poisoning | 800-999 |
| Other | 290-319,320-359,360-389,580-629,630-679,680-709,710-739,740-759,760-779,780-799 |

**Supplementary Figure 1**: Study flow


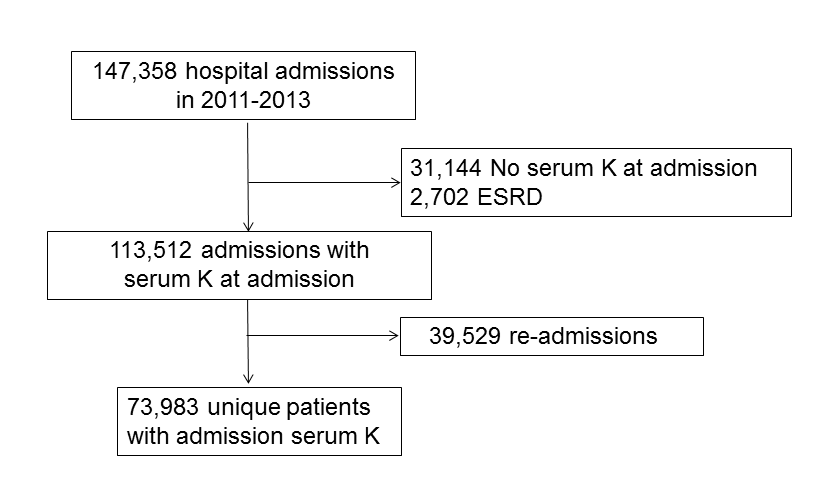


**Supplementary Figure 2**: Serum K distribution


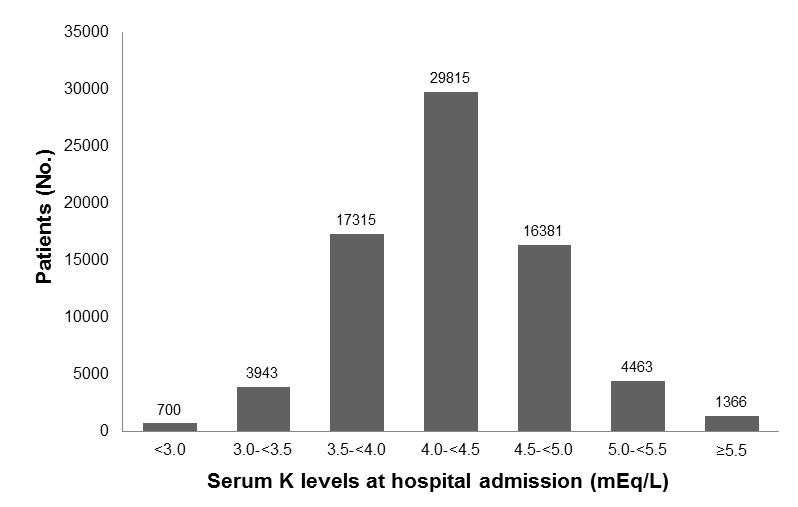

Supplement: supplemental_document_hcx118.docx [file supplemental_document_hcx118.docx]
